# Supplementary material for: Activation of EP4 receptor limits transition of acute to chronic heart failure in lipoxygenase deficient mice
Source: PubMed Central journal article supplement (PMC7806484; doi:10.7150/thno.51183), 2021-01-01
Supplement: thnov11p2742s1.pdf [file thnov11p2742s1.pdf]

1 **Supplementary figure legends**

2 **Figure-S1:**

3 **Plane polarized light applied LV-mid-cavity images stained with picro sirius red indicative of**  
4 **fibrosis.**

5 **(A)** 1.25x images of the complete LV. **(B)** 40x images of the LV infarct zone. **(C)** 40X images of the LV  
6 peri-infarct zone (border) in WT and 12/15LOX<sup>-/-</sup> mice during CHF (post-MI d28 and d56) displaying  
7 changes in fibrosis (scale bar = 50 μm); n = 10 mice/group/day.

8 **Figure-S2:**

9 **12/15LOX deletion robustly increases EP4 not EP2 in LV infract post-MI in progressive heart**  
10 **failure with monocyte trafficking marker CCL2.**

11 **(A)** Immunoblot showing robust increase EP2 and CCL2 in post-MI in WT and 12/15LOX<sup>-/-</sup> mice in heart  
12 failure. **(B)** mRNA expression of *EP2* **(C)** Densitometric analysis of EP2 in WT and 12/15LOX<sup>-/-</sup> mice in  
13 no-MI and post-MI d1 till d56. **(D)** mRNA expression of EP2 in isolated leukocytes at post-MI d1, d5  
14 and in cardiac fibroblast (CF) at post-MI d5 isolated from LV infarct. **(E)** mRNA expression of *EP2* on  
15 peritoneal MΦ (Naïve, M1 and M2 phenotype) isolated from WT and 12/15LOX<sup>-/-</sup> mice. **(G)** mRNA  
16 expression of *CCL2* **(H)** Densitometric analysis of *CCL2* in WT and 12/15LOX<sup>-/-</sup> mice in no-MI and post-  
17 MI d1 till d56. Box plots show median and interquartile range. Minimum and maximum values are  
18 represented in each group by the whiskers of the plot; n = 2 – 5 mice/group/day; \* p < 0.05 vs d0  
19 respective control, # p < 0.05 vs WT at respective time point. Analysis of variance (ANOVA), followed  
20 by Newman–Keuls post-hoc test, was used for multiple comparisons.

21 **Figure-S3:**

22 Expanded representative immunofluorescence images displaying images cardiomyocyte area by WGA  
23 staining (green) and EP4 expression (red) in LV infarct and LV remote are of WT and 12/15LOX<sup>-/-</sup> mice  
24 in no-MI controls and at d5 post MI (magnification= 40X, scale =20 μm). Images are representative of  
25 5 - 8 field/slide; n = 4 slide/group

26 **Figure-S4:**

27 Expanded representative immunofluorescence images displaying EP4 expression (red) and nuclei  
28 (blue) on peritoneal macrophages (Naïve, M1 and M2 phenotype) isolated from WT and 12/15LOX<sup>-/-</sup>  
29 mice. WT peritoneal macrophages (Naïve, M1 and M2 phenotype) was treated with EP4 agonist

1 (CAY10598 - 100nM) to confirm EP4 stimulation (magnification = 40X, scale = 50  $\mu$ m; zoom = 5.72;  
2 scale =10  $\mu$ m). Images are representative of 5 - 8 field/slide; n = 4 slide/group.

3 **Figure-S5:**

4 Expanded representative immunofluorescence images displaying EP4 expression (red) and  
5 nuclei(blue) on cardiac fibroblast and myofibroblast (treated with TGF- $\beta$ -15 ng/mL for 18 h) isolated  
6 from WT and 12/15LOX<sup>-/-</sup> mice (magnification = 40X, scale = 50  $\mu$ m; zoom = 3.53; scale = 10  $\mu$ m).  
7 Images are representative of 5 - 8 field/slide; n = 4 slide/group.

8 **Figure S6:**

9 Bar graph representing fold change of statistically significant miRNAs in 12/15LOX<sup>-/-</sup> mice in  
10 progression of AHF to CHF. (The cut off is 2 fold change); n = 4 mice/group for each time point. Student  
11 t-test (unpaired) was applied comparing miRs expression at the particular day to naive control (d0).

12

13

14

1 **S Figure 1**

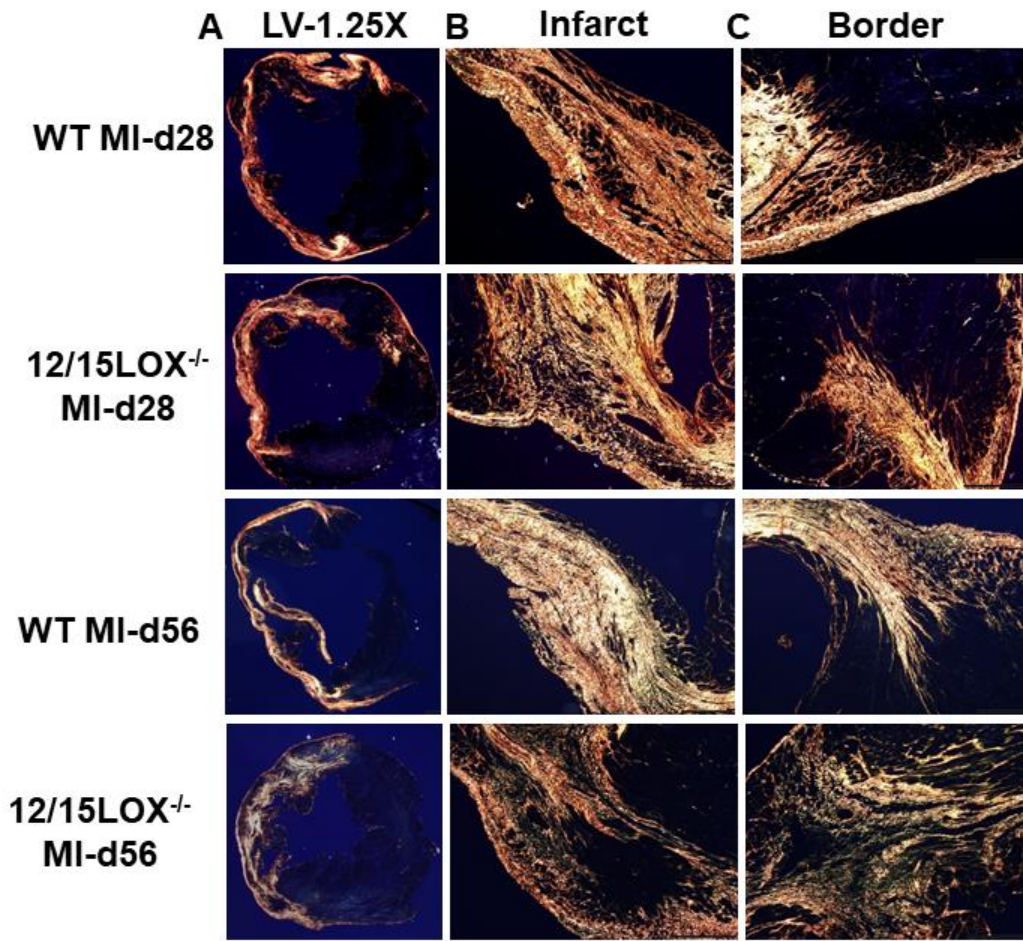

2

3

4

5

6

7

8

9

10

11

1 **S Figure 2**

**LV-Infarct**

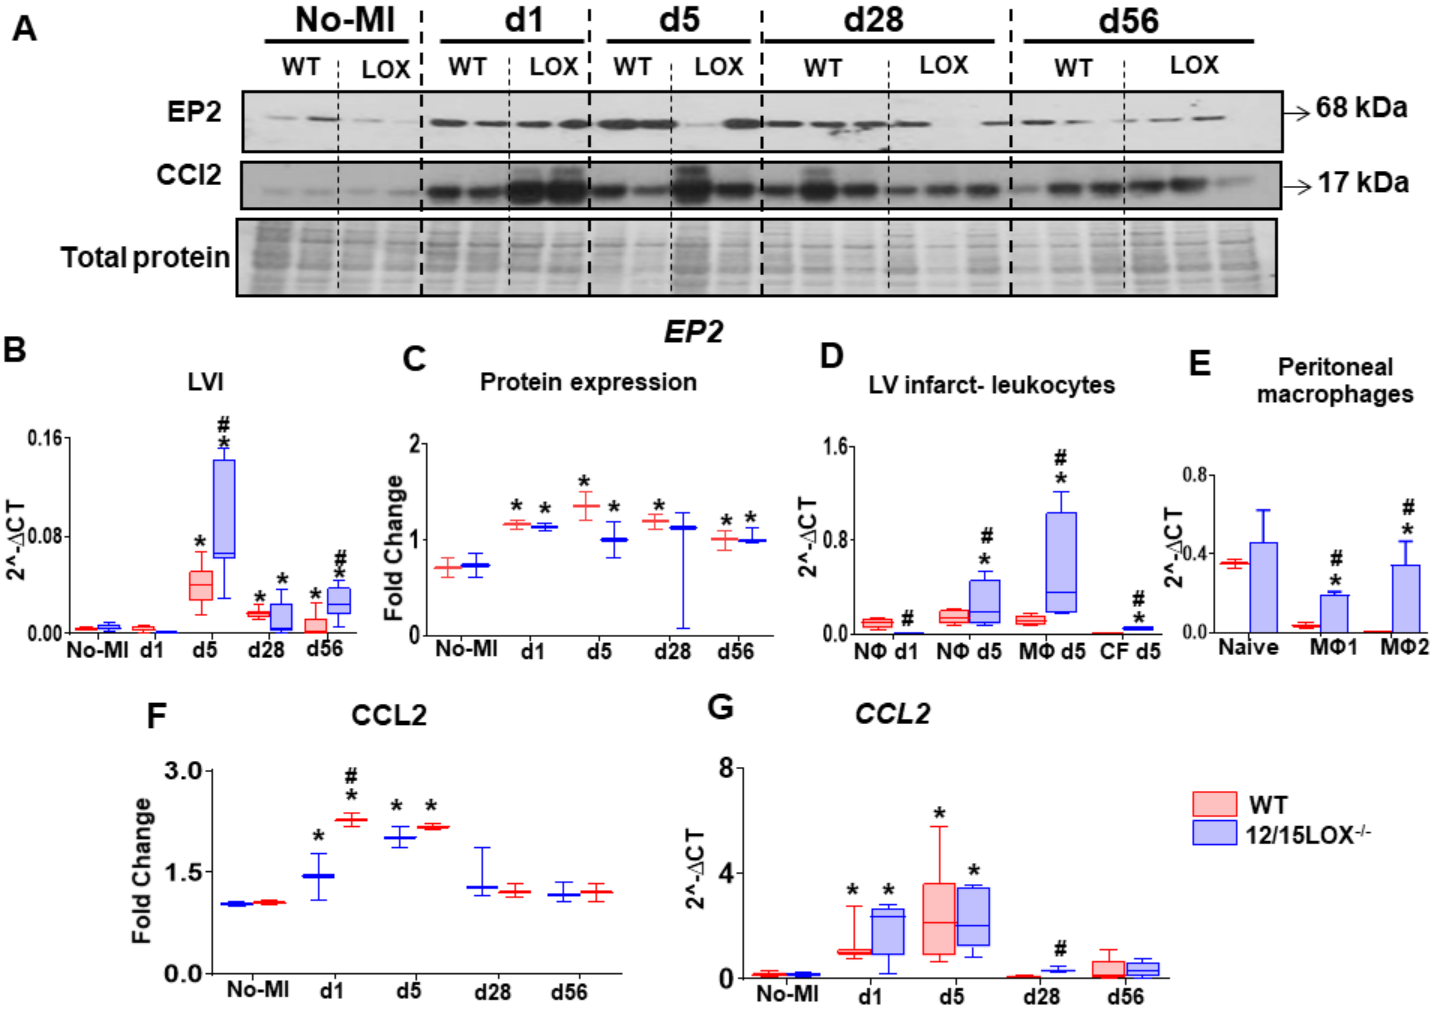

2  
3  
4  
5  
6  
7  
8  
9  
10  
11

1 S Figure 3

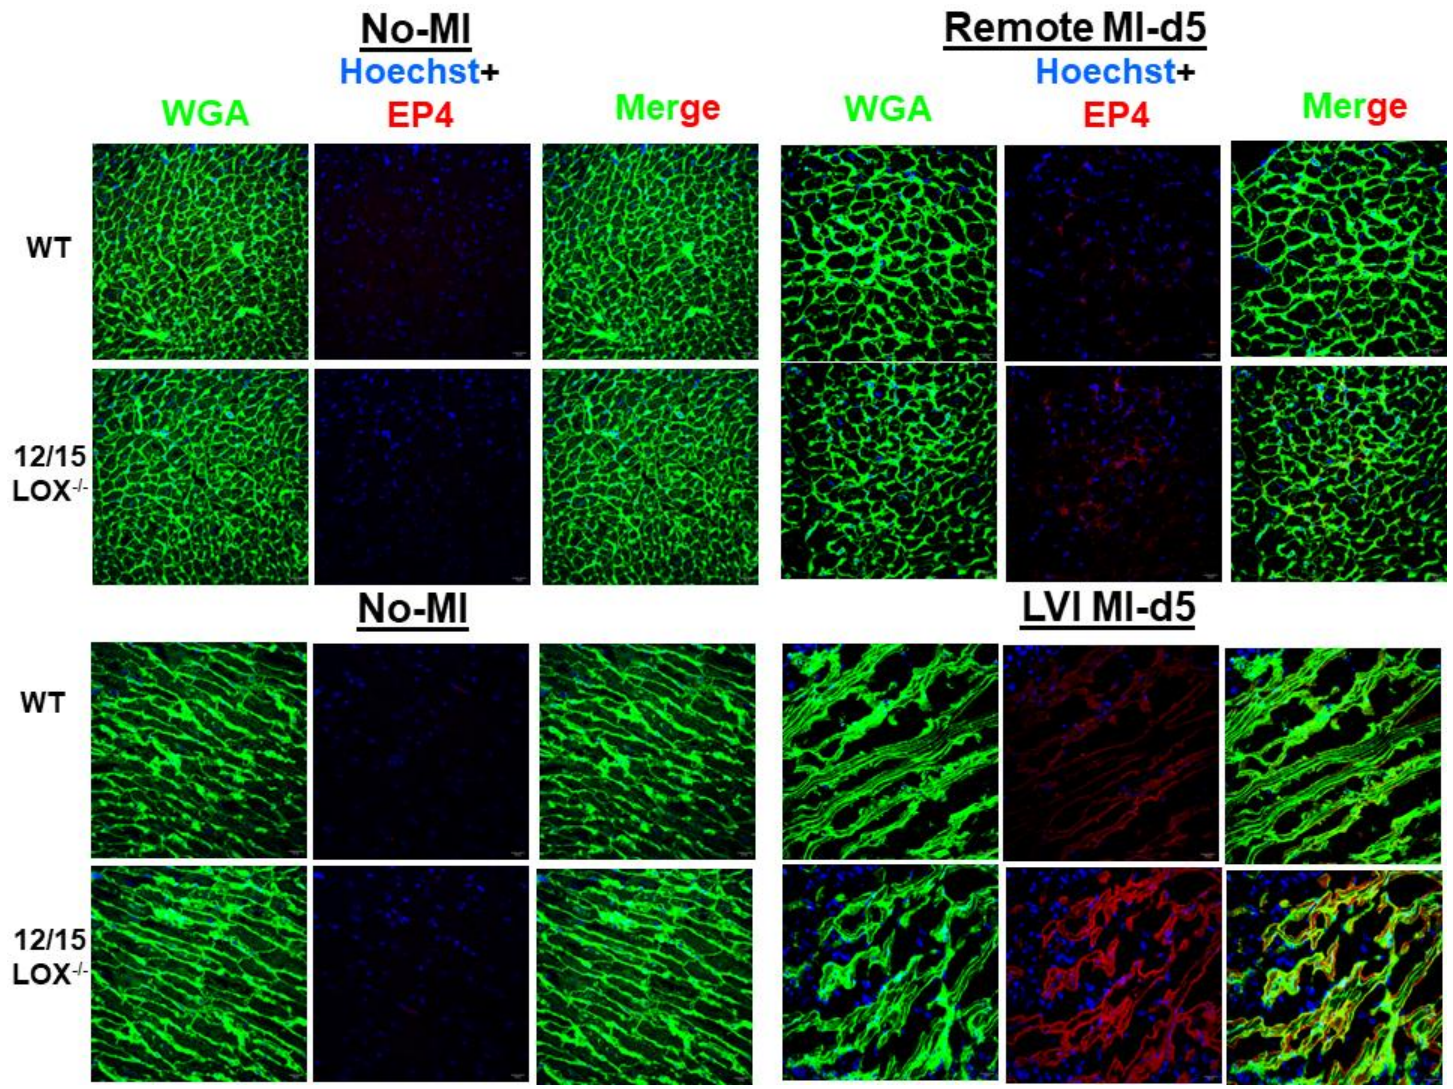

2  
3  
4  
5  
6  
7  
8  
9  
10  
11

1 **S Figure 4**

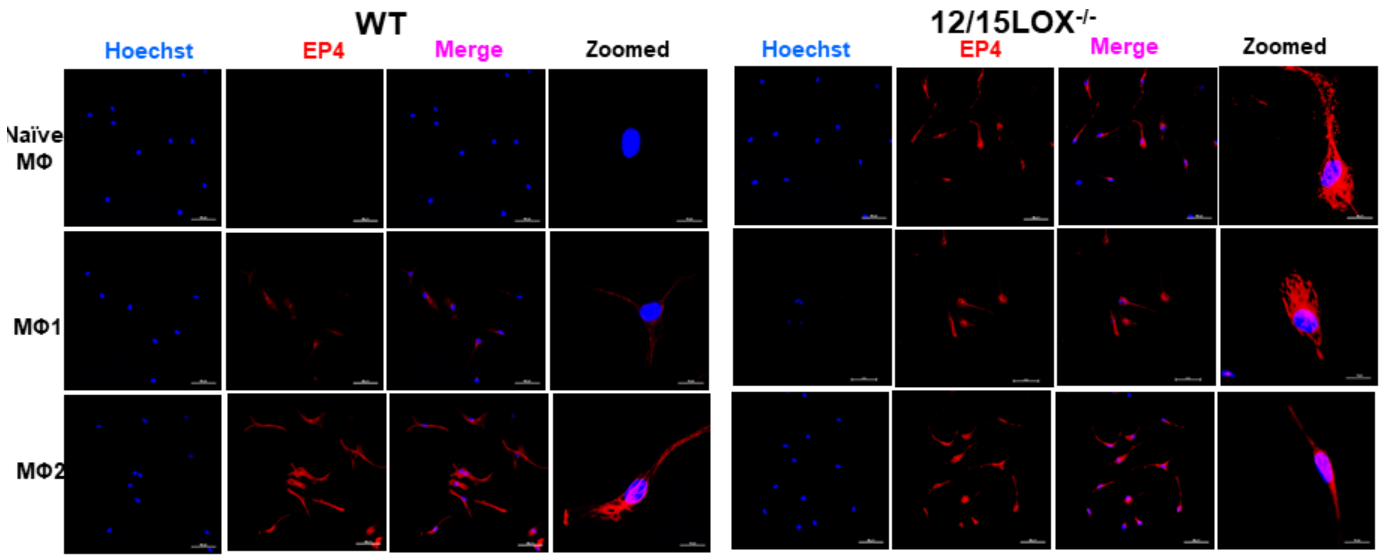

**CAY10598 (100nM)-2hrs**

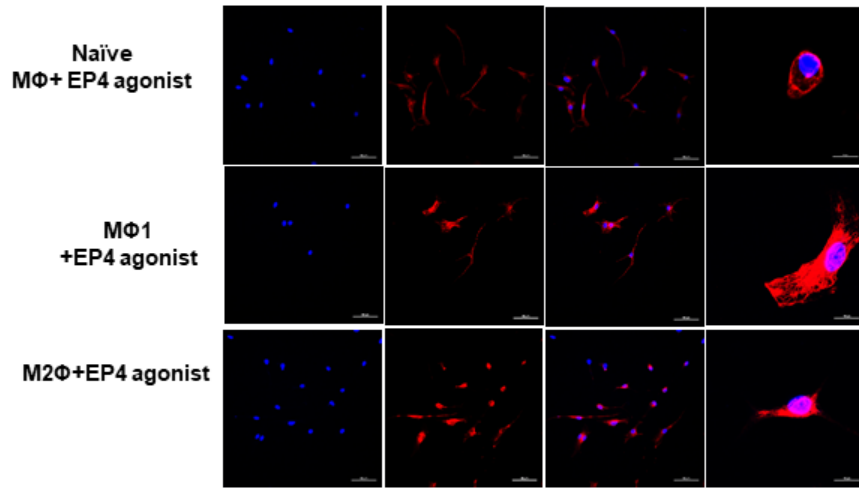

2  
3  
4  
5  
6  
7  
8  
9  
10  
11

1 **S Figure 5**

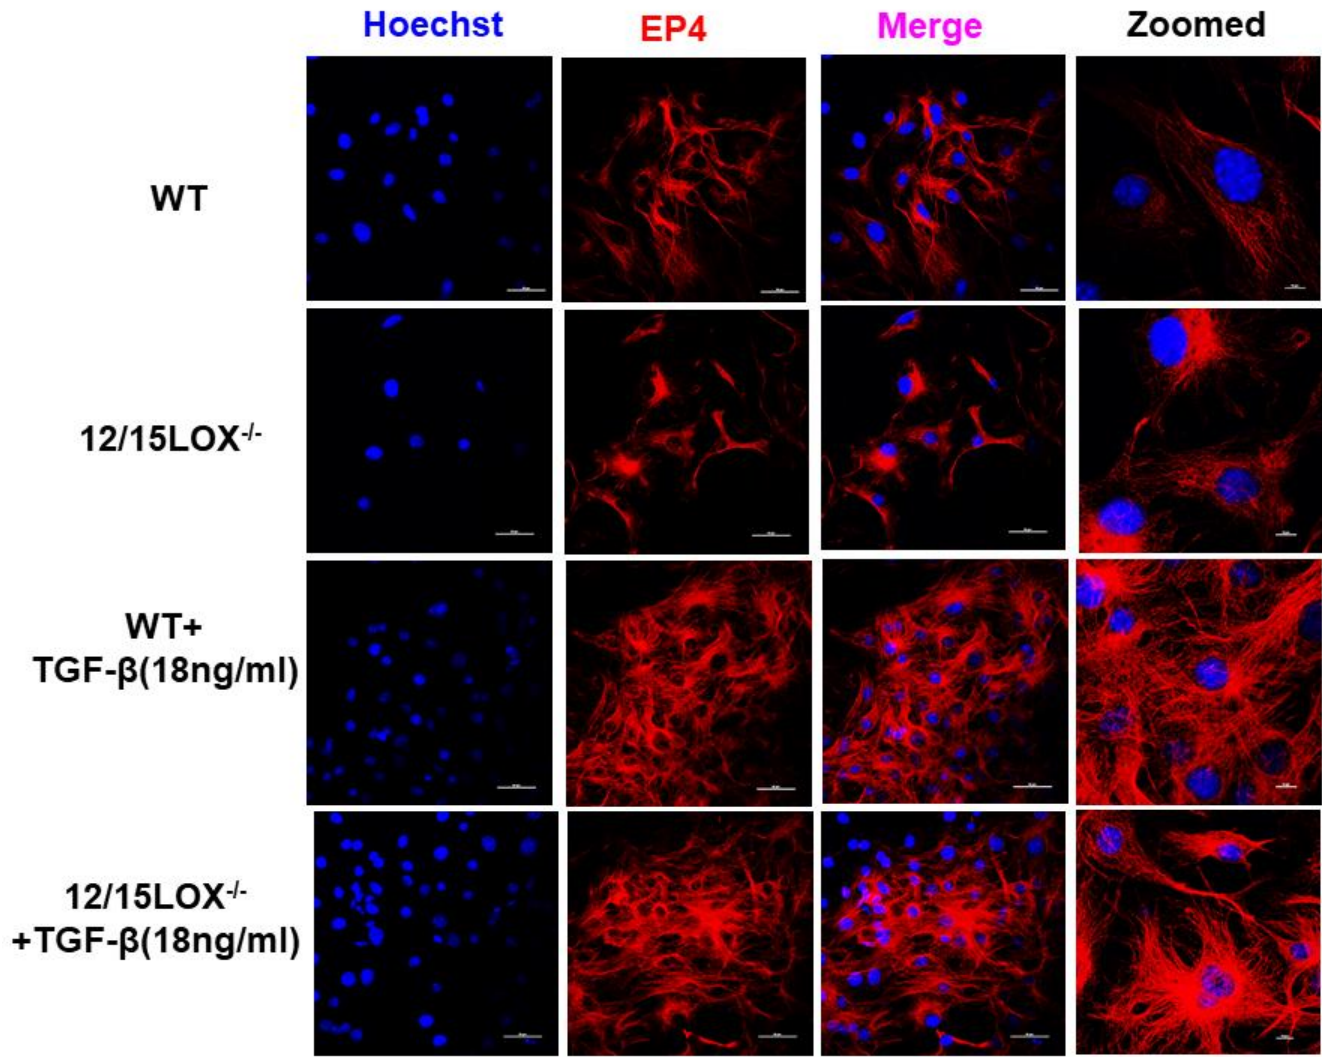

2  
3  
4  
5  
6  
7  
8  
9  
10  
11

1 S Figure 7

AHF

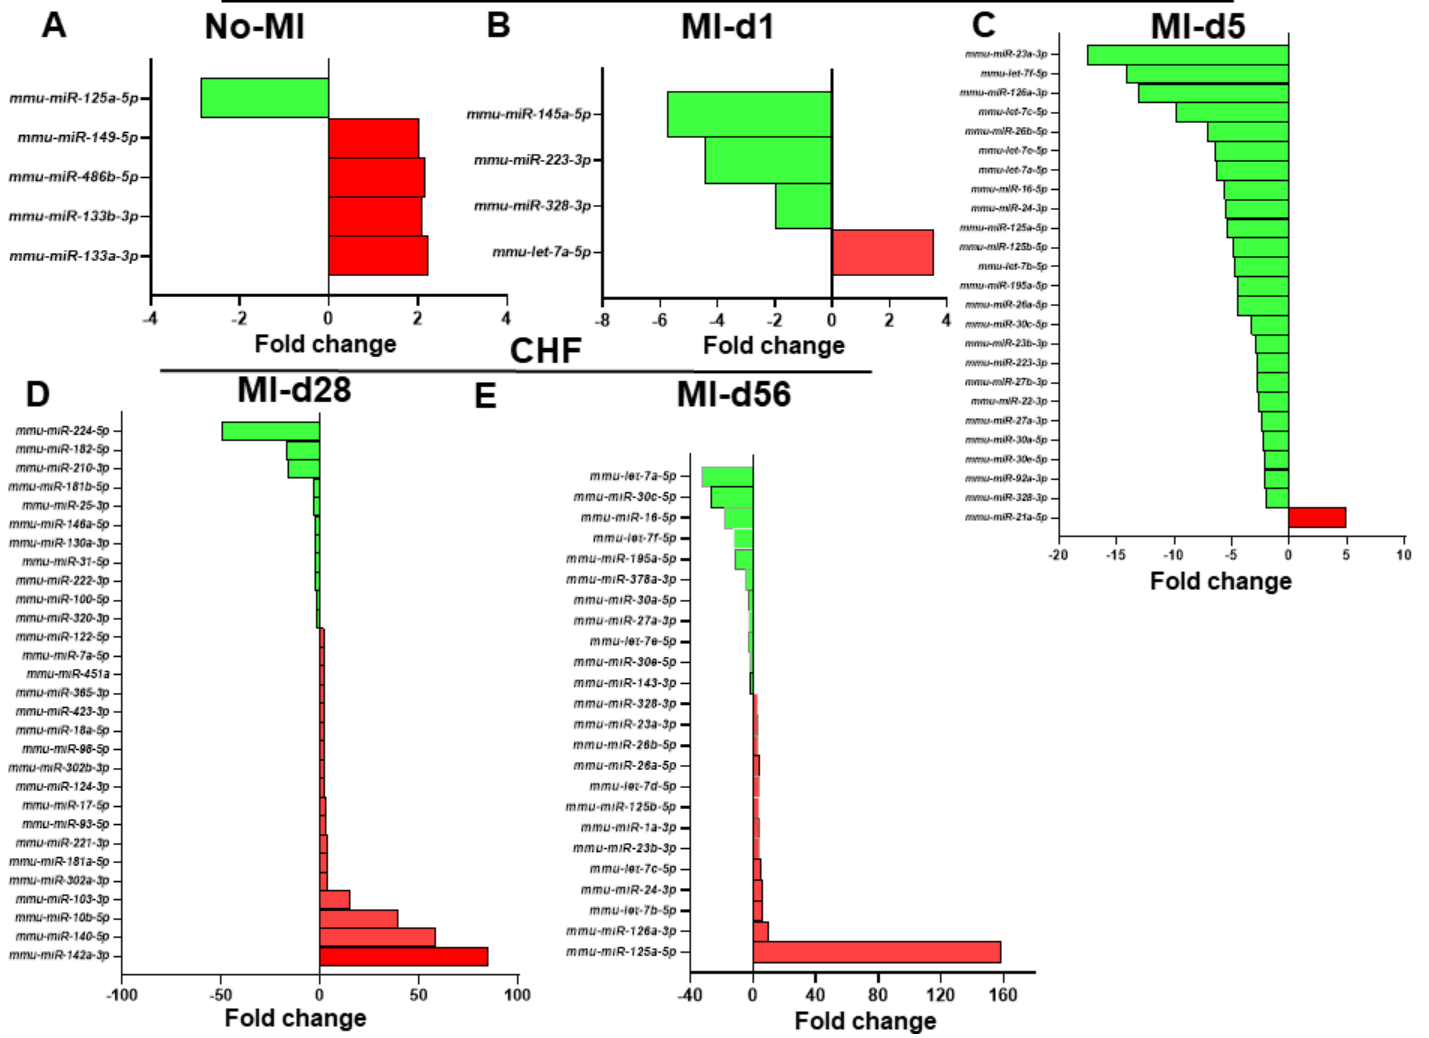

2
